# Supplementary material for: Quantitative fat-fraction analysis of the rotator cuff muscles on clinical sagittal and coronal T1-weighted MRI using deep learning algorithms
Source: Research Square preprint supplement (doi:10.21203/rs.3.rs-7851181/v1), 2025-11-11
Supplement: Supplementary file 1 [file 34f531b5eb379601c1ac32aa.xlsx]

## Sheet: Table_1
			Goutallier grade
			0		1		2		3		4
	Supraspinatus		18		38		32		7		4
	Infraspintaus		11		53		33		0		2
	Teres Minor		53		37		8		0		1
	Subscapularis		34		47		13		1		4
