# Supplementary material for: Quantitative fat-fraction analysis of the rotator cuff muscles on clinical sagittal and coronal T1-weighted MRI using deep learning algorithms
Source: Research Square preprint supplement (doi:10.21203/rs.3.rs-7851181/v1), 2025-11-11
Supplement: Supplementary file 2 [file 8829ea478c508f826d0bf051.xlsx]

## Sheet: Table_2
		ground-truth quantitative fat [%]						automatic quantitative fat (sagittal) [%]						automatic quantitative fat (coronal) [%]
		sagittal			coronal			measurements			errors			measurements			errors
		mean	SD		mean	SD		mean	SD		mean	SD		mean	SD		mean	SD
Subscapularis		14.8	7.9		15.5	7.6		14.2	6.8		-0.5	2.2		15.6	7.9		0.1	2.3
Infraspintaus		12.1	4.4		14.2	4.7		15.5	4.7		1.3	1.9		13.5	4		1.4	2
Supraspinatus		15.2	6.1		15.4	6.6		17.8	8.2		2.3	3.9		16.9	6.4		1.7	2.1
Teres Minor		11.8	5.1		12.4	4.7		14	4.4		1.5	2.8		12.2	3.2		0.4	3.5
