# Supplementary material for: Quantitative fat-fraction analysis of the rotator cuff muscles on clinical sagittal and coronal T1-weighted MRI using deep learning algorithms
Source: Research Square preprint supplement (doi:10.21203/rs.3.rs-7851181/v1), 2025-11-11
Supplement: Supplementary file 3 [file 920ea296c6f40c9545406515.xlsx]

## Sheet: Table_3
		quantitative fat (GT) [%]			quantitative fat (fat mask) [%]						automatic quantitative fat (proposed method) [%]
		measurements			measurements			errors			measurements			errors
		mean	SD		mean	SD		mean	SD		mean	SD		mean	SD
Subscapularis		15.2	7.7		8.7	11.3		-6.5	4		14.9	7.3		-0.2	2.2
Infraspintaus		13.1	4.6		7.3	5.6		-5.9	1.5		14.5	4.4		1.4	1.9
Supraspinatus		15.3	6.3		9.6	8.5		-5.7	2.5		17.3	7.3		2	3.1
Teres Minor		12.1	4.8		5.6	5		-6.6	1.1		13.1	3.9		1	3.2
